# Supplementary material for: Detection of locus-specific N6-methyladenosine modification based on Ag+-assisted ligation and supersandwich signal amplification
Source: Royal Society of Chemistry journal article supplement (doi:10.1039/d0an02214d), 2020-12-15
Supplement: d0an02214d1.pdf [file d0an02214d1.pdf]

# Electronic Supplementary Material

## Detection of Locus-Specific N<sup>6</sup>-Methyladenosine Modification Based on Ag<sup>+</sup>-Assisted Ligation and Supersandwich Signal Amplification

*Yanxia Wang,<sup>†</sup> Ji Zheng,<sup>†</sup> Chengjie Duan, Jin Jiao, Youjing gong, Hai Shi, Yang  
Xiang,\**

State Key Laboratory of Pharmaceutical Biotechnology, School of Life Sciences,  
Nanjing University, Nanjing 210023, P. R. China

### **Table S1 DNA oligonucleotides used in the work.**

---

\* Corresponding authors: xiangy@nju.edu.cn (Y. Xiang)

<sup>†</sup> These authors contributed equally to this work.

---

| <b>Name</b> | <b>Sequences (5'-3')</b>                                                                  |
|-------------|-------------------------------------------------------------------------------------------|
| I           | SH (CH <sub>2</sub> ) <sub>6</sub> -TCC GAG CCC GAC GCA TGA TCT GTA CTT GAC-OH            |
| T           | ATC AAG TAC AGA TCA TGC GTT GCA CGG TCG /6-MedA/TC AAG<br>TAC AGA TCA TGC GTC GGG CTC GGA |
| TA          | ATC AAG TAC AGA TCA TGC GTT GCA CGG TCG ATC AAG TAC<br>AGA TCA TGC GTC GGG CTC GGA        |
| P1          | CGA CCG TGC AAC GCA TGA                                                                   |
| P2          | CGA CCG TGC AAC GCA TGA TCT GTA CTT GAT CCC TAA CCC<br>TAA CCC TAA                        |
| H1          | CCC TAA CCC TAA GTA GTG TTA GGG TTA GGG TTA GGG-MB                                        |
| H2          | MB-CAC TAC TTA GGG TTA GGG CCC TAA CCC TAA CCC TAA                                        |

---

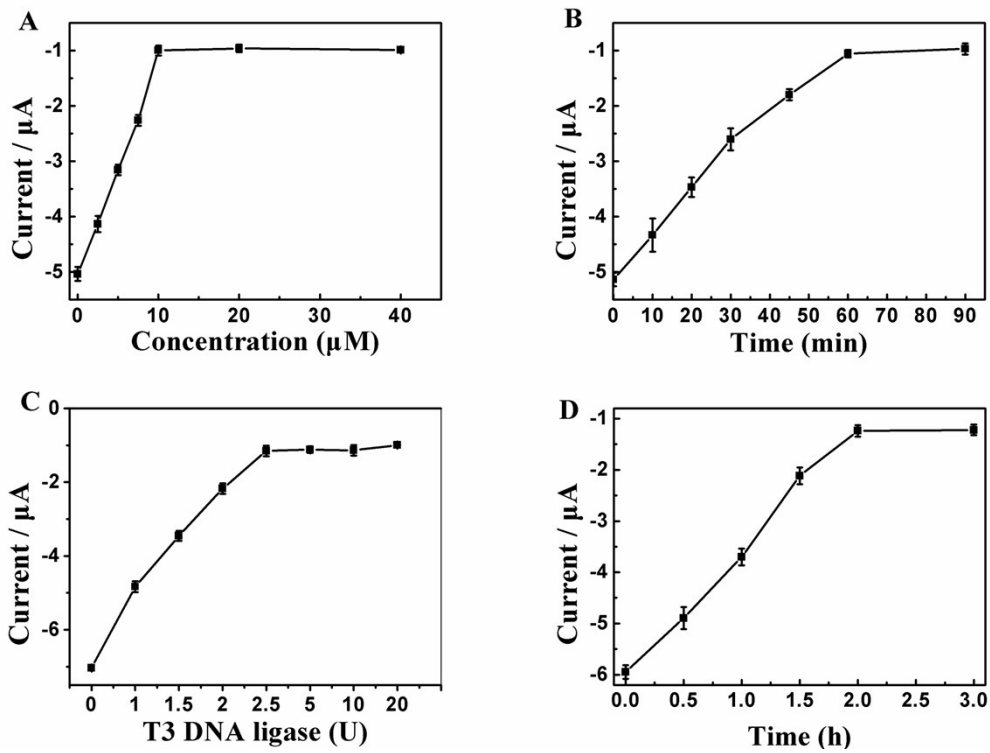

**Fig. S1.** The optimization of (A) Ag<sup>+</sup> concentration. (B) The reaction time of Ag<sup>+</sup> mediated base pairing of A and C. (C) T3 DNA ligase concentration. (D) The reaction time of T3 DNA ligase.

**Table S2. Comparison of the proposed method with other reported methods**

| <b>Detection strategy</b>                      | <b>Target analyte</b>  | <b>Sample source</b>                               | <b>Detection limit</b> | <b>Ref.</b> |
|------------------------------------------------|------------------------|----------------------------------------------------|------------------------|-------------|
| Optical                                        | DNA methylation        | Human lung cancer                                  | 0.8 fM                 | 33          |
| Photoelectrochemical                           | DNA methylation        | Synthetic oligonucleotides                         | 35 fM                  | 34          |
| Electrochemical                                | DNA methylation        | Synthetic CpG oligonucleotides (20-mer and 60-mer) | Not mentioned          | 35          |
| Liquid chromatography tandem mass spectrometry | Global DNA methylation | Normal and tumor tissues of colorectal cancer      | 0.05 pg                | 36          |
| High-performance capillary electrophoresis     | Global DNA methylation | Methotrexate-resistant A549 cells                  | 1 $\mu$ M              | 37          |
| Fluorimetric nanobiosensor                     | DNA methylation        | Sequence of APC gene                               | 0.31 fM                | 38          |
| Electrochemical                                | DNA methylation        | Synthetic oligonucleotides                         | 44.427 pM              | This work   |
